# Supplementary material for: Successful Preventive Treatment of Oncogenic Transforming HPV Infections in Low-Grade Cytology (ASC-US/LSIL) Patients with an Adsorptive and Antioxidant Vaginal Gel
Source: MDPI journal article supplement (doi:10.3390/jcm12124142), 2023-06-20
Supplement: s1 [file s1]

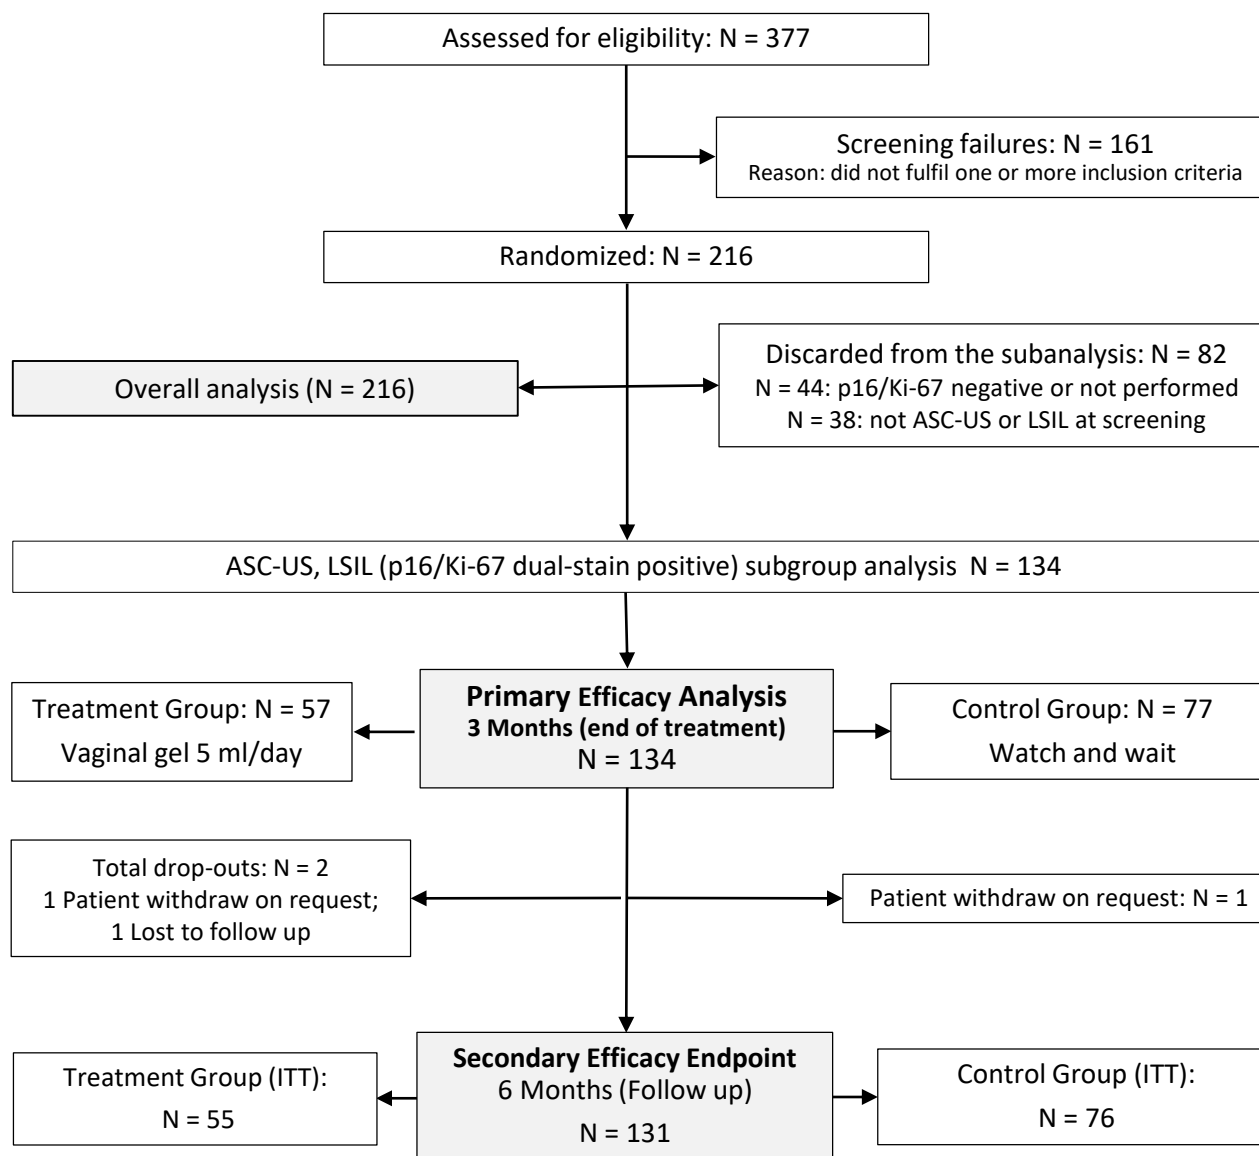

**Figure S1:** CONSORT Flow Diagram of patients included in the study ITT: Intention-To-Treat Population
